# Supplementary material
Source: PubMed Central journal article supplement (PMC5134979)
Supplement: supp_tpc.16.00379_TPC2016-00379-RAR3_Supplemental_Data_Set2_4.pdf [file supp_tpc.16.00379_TPC2016-00379-RAR3_Supplemental_Data_Set2_4.pdf]

**Supplemental Data set 2a.** Wild rice accessions used in the haplotype and nucleotide diversity analyses.

| Name       | Species             | Original area |
|------------|---------------------|---------------|
| IRGC83817  | <i>O. rufipogon</i> | Viet Nam      |
| IRGC106167 | <i>O. rufipogon</i> | Viet Nam      |
| IRGC88788  | <i>O. rufipogon</i> | Bangladesh    |
| IRGC88790  | <i>O. rufipogon</i> | Bangladesh    |
| IRGC105881 | <i>O. rufipogon</i> | Bangladesh    |
| IRGC105905 | <i>O. rufipogon</i> | Bangladesh    |
| IRGC89170  | <i>O. rufipogon</i> | Lao Pdr       |
| IRGC106160 | <i>O. rufipogon</i> | Lao Pdr       |
| IRGC93052  | <i>O. rufipogon</i> | Cambodia      |
| IRGC110412 | <i>O. rufipogon</i> | Cambodia      |
| IRGC104851 | <i>O. rufipogon</i> | Thailand      |
| IRGC105842 | <i>O. rufipogon</i> | Thailand      |
| IRGC104996 | <i>O. rufipogon</i> | India         |
| IRGC106078 | <i>O. rufipogon</i> | India         |
| IRGC106115 | <i>O. rufipogon</i> | India         |
| IRGC104999 | <i>O. rufipogon</i> | Indonesia     |
| IRGC105952 | <i>O. rufipogon</i> | Indonesia     |
| IRGC105956 | <i>O. rufipogon</i> | Indonesia     |
| IRGC86542  | <i>O. rufipogon</i> | Australia     |
| IRGC93285  | <i>O. rufipogon</i> | Nepal         |
| IRGC101075 | <i>O. rufipogon</i> | Philippines   |
| 1-103      | <i>O. rufipogon</i> | China         |
| 1-113      | <i>O. rufipogon</i> | China         |
| 1-121      | <i>O. rufipogon</i> | China         |
| 1-134      | <i>O. rufipogon</i> | China         |
| 1-2        | <i>O. rufipogon</i> | China         |
| 1-30       | <i>O. rufipogon</i> | China         |
| 1-40       | <i>O. rufipogon</i> | China         |
| 1-41       | <i>O. rufipogon</i> | China         |
| 1-43       | <i>O. rufipogon</i> | China         |
| 1-49       | <i>O. rufipogon</i> | China         |
| 1-51       | <i>O. rufipogon</i> | China         |
| 1-70       | <i>O. rufipogon</i> | China         |
| 1-71       | <i>O. rufipogon</i> | China         |
| 1-76       | <i>O. rufipogon</i> | China         |
| 1-81       | <i>O. rufipogon</i> | China         |
| 1-82       | <i>O. rufipogon</i> | China         |
| IRGC88906  | <i>O. rufipogon</i> | Cambodia      |
| IRGC110415 | <i>O. rufipogon</i> | Cambodia      |
| IRGC93195  | <i>O. rufipogon</i> | Nepal         |
| IRGC93196  | <i>O. rufipogon</i> | Nepal         |
| IRGC100594 | <i>O. rufipogon</i> | Taiwan        |
| IRGC103306 | <i>O. rufipogon</i> | Taiwan        |
| IRGC104687 | <i>O. rufipogon</i> | India         |

|            |                     |            |
|------------|---------------------|------------|
| IRGC104692 | <i>O. rufipogon</i> | India      |
| IRGC105423 | <i>O. rufipogon</i> | India      |
| IRGC105631 | <i>O. rufipogon</i> | India      |
| IRGC106111 | <i>O. rufipogon</i> | India      |
| IRGC104824 | <i>O. rufipogon</i> | Thailand   |
| IRGC105458 | <i>O. rufipogon</i> | Sri Lanka  |
| IRGC105459 | <i>O. rufipogon</i> | Sri Lanka  |
| IRGC105948 | <i>O. rufipogon</i> | Bangladesh |
| IRGC105959 | <i>O. rufipogon</i> | Bangladesh |

**Supplemental Data set 2b.** Rice cultivars used in the haplotype and nucleotide diversity analyses.

| Name                | Species          | Subspecies      | Original area |
|---------------------|------------------|-----------------|---------------|
| Libu                | <i>O. sativa</i> | <i>japonica</i> | Philippines   |
| Kutube              | <i>O. sativa</i> | <i>japonica</i> | Philippines   |
| Bunian              | <i>O. sativa</i> | <i>japonica</i> | Philippines   |
| Lepqu               | <i>O. sativa</i> | <i>japonica</i> | Philippines   |
| Methi Noi           | <i>O. sativa</i> | <i>japonica</i> | Laos          |
| Rasi Pagalou        | <i>O. sativa</i> | <i>japonica</i> | Malaysia      |
| Chabli Chabol Glang | <i>O. sativa</i> | <i>japonica</i> | Thailand      |
| Do Khao             | <i>O. sativa</i> | <i>japonica</i> | Laos          |
| Kenteng             | <i>O. sativa</i> | <i>japonica</i> | Laos          |
| Lepsang             | <i>O. sativa</i> | <i>japonica</i> | Laos          |
| Bhat Mukhu          | <i>O. sativa</i> | <i>indica</i>   | Bengal        |
| Jabonl              | <i>O. sativa</i> | <i>japonica</i> | Bengal        |
| Padi Lasat          | <i>O. sativa</i> | <i>japonica</i> | Malaysia      |
| Kasinkan            | <i>O. sativa</i> | <i>japonica</i> | Philippines   |
| Colombo             | <i>O. sativa</i> | <i>indica</i>   | India         |
| DoDo                | <i>O. sativa</i> | <i>indica</i>   | Philippines   |
| Hr33                | <i>O. sativa</i> | <i>indica</i>   | Philippines   |
| R2389               | <i>O. sativa</i> | <i>indica</i>   | Philippines   |
| Act                 | <i>O. sativa</i> | <i>indica</i>   | Philippines   |
| Fukuyama            | <i>O. sativa</i> | <i>japonica</i> | Japan         |
| Agbede              | <i>O. sativa</i> | <i>indica</i>   | Philippines   |
| Hoshikalmi          | <i>O. sativa</i> | <i>indica</i>   | Philippines   |
| System 400          | <i>O. sativa</i> | <i>japonica</i> | Korea         |
| Mollika(sel)        | <i>O. sativa</i> | <i>indica</i>   | Nepal         |
| DM36                | <i>O. sativa</i> | <i>indica</i>   | Vietnam       |
| KK15-37-C           | <i>O. sativa</i> | <i>indica</i>   | Nepal         |
| Qing Feng           | <i>O. sativa</i> | <i>japonica</i> | Japan         |
| GeLuo 4             | <i>O. sativa</i> | <i>indica</i>   | Thailand      |
| Liri Palmen         | <i>O. sativa</i> | <i>indica</i>   | Pakistan      |
| Barkat              | <i>O. sativa</i> | <i>indica</i>   | India         |
| Kashmin Basmali     | <i>O. sativa</i> | <i>indica</i>   | Pakistan      |
| NR10045-20-3-2      | <i>O. sativa</i> | <i>indica</i>   | Nepal         |
| Sein Ta lay         | <i>O. sativa</i> | <i>indica</i>   | Myanmar       |
| Horomamawee         | <i>O. sativa</i> | <i>indica</i>   | Sri Lanka     |
| Polayal upland      | <i>O. sativa</i> | <i>indica</i>   | Sri Lanka     |
| Naw Sadui           | <i>O. sativa</i> | <i>indica</i>   | Thailand      |

|                     |                  |                 |           |
|---------------------|------------------|-----------------|-----------|
| Basmati Dhan        | <i>O. sativa</i> | <i>indica</i>   | Pakistan  |
| Kalu Murunga        | <i>O. sativa</i> | <i>indica</i>   | Pakistan  |
| XX-4                | <i>O. sativa</i> | <i>indica</i>   | Thailand  |
| Basmati Hunar       | <i>O. sativa</i> | <i>indica</i>   | Pakistan  |
| PyongYang 11        | <i>O. sativa</i> | <i>japonica</i> | Korea     |
| Lateefy             | <i>O. sativa</i> | <i>indica</i>   | Pakistan  |
| Chiem Bua           | <i>O. sativa</i> | <i>indica</i>   | Vietnam   |
| Re Them Ha Dong     | <i>O. sativa</i> | <i>indica</i>   | Vietnam   |
| Sai Duong Thamhheai | <i>O. sativa</i> | <i>indica</i>   | Vietnam   |
| Tep1                | <i>O. sativa</i> | <i>indica</i>   | Vietnam   |
| Tep2                | <i>O. sativa</i> | <i>indica</i>   | Vietnam   |
| DR32                | <i>O. sativa</i> | <i>indica</i>   | Vietnam   |
| Chakula             | <i>O. sativa</i> | <i>indica</i>   | Bengal    |
| Kangpur             | <i>O. sativa</i> | <i>indica</i>   | Bengal    |
| GH 319              | <i>O. sativa</i> | <i>indica</i>   | Indonesia |
| Muda                | <i>O. sativa</i> | <i>indica</i>   | Malaysia  |
| Cikapunduag         | <i>O. sativa</i> | <i>indica</i>   | Indonesia |
| Beok Montor         | <i>O. sativa</i> | <i>indica</i>   | Indonesia |
| Sipapak             | <i>O. sativa</i> | <i>japonica</i> | Indonesia |
| Ase Bolon Kamandi   | <i>O. sativa</i> | <i>indica</i>   | Indonesia |
| Bali Ketumbaran     | <i>O. sativa</i> | <i>indica</i>   | Indonesia |
| Beri                | <i>O. sativa</i> | <i>indica</i>   | Bengal    |
| Dupanyui            | <i>O. sativa</i> | <i>japonica</i> | Indonesia |
| Kathemax            | <i>O. sativa</i> | <i>indica</i>   | Indonesia |
| YouFeng             | <i>O. sativa</i> | <i>japonica</i> | Japan     |
| DuanGengNuo         | <i>O. sativa</i> | <i>japonica</i> | Japan     |
| PingBei 9           | <i>O. sativa</i> | <i>japonica</i> | Korea     |
| ChiJin              | <i>O. sativa</i> | <i>japonica</i> | Korea     |
| GaoLiQiu            | <i>O. sativa</i> | <i>japonica</i> | Korea     |
| MiLiZhu             | <i>O. sativa</i> | <i>japonica</i> | Korea     |
| XinChuanChiNuo      | <i>O. sativa</i> | <i>japonica</i> | Korea     |
| Jamuna              | <i>O. sativa</i> | <i>indica</i>   | India     |
| Jabahulo            | <i>O. sativa</i> | <i>indica</i>   | Bengal    |
| ChangZhong          | <i>O. sativa</i> | <i>japonica</i> | China     |
| SanChaoQI           | <i>O. sativa</i> | <i>japonica</i> | China     |
| PuTaoLvZhong        | <i>O. sativa</i> | <i>japonica</i> | China     |
| MuXiuQiu            | <i>O. sativa</i> | <i>japonica</i> | China     |
| SanYiQian           | <i>O. sativa</i> | <i>japonica</i> | China     |
| TianJiQing          | <i>O. sativa</i> | <i>japonica</i> | China     |
| ChiHeiTouHong       | <i>O. sativa</i> | <i>japonica</i> | China     |
| CunSangLi           | <i>O. sativa</i> | <i>japonica</i> | China     |
| GanShangChen        | <i>O. sativa</i> | <i>japonica</i> | China     |
| NanXiongZaoYouZang  | <i>O. sativa</i> | <i>indica</i>   | China     |
| XingGuo             | <i>O. sativa</i> | <i>japonica</i> | China     |
| BaiBaoDao           | <i>O. sativa</i> | <i>japonica</i> | China     |
| XiangAiZao10Hao     | <i>O. sativa</i> | <i>indica</i>   | China     |
| NanTeHao            | <i>O. sativa</i> | <i>indica</i>   | China     |
| ZaoXian140          | <i>O. sativa</i> | <i>indica</i>   | China     |
| RongHuaMaoHuLu      | <i>O. sativa</i> | <i>japonica</i> | China     |
| ShuiYuan300Li       | <i>O. sativa</i> | <i>japonica</i> | China     |
| YeLiCangHua         | <i>O. sativa</i> | <i>japonica</i> | China     |

|                          |                  |                 |       |
|--------------------------|------------------|-----------------|-------|
| ZhongLouYiHao 1          | <i>O. sativa</i> | <i>japonica</i> | China |
| WeiGuo                   | <i>O. sativa</i> | <i>japonica</i> | China |
| TieGanWu                 | <i>O. sativa</i> | <i>japonica</i> | China |
| JieFangXian              | <i>O. sativa</i> | <i>indica</i>   | China |
| TaiShanNuo               | <i>O. sativa</i> | <i>indica</i>   | China |
| HengXianLiangChunBen     | <i>O. sativa</i> | <i>indica</i>   | China |
| LiuYeZhan                | <i>O. sativa</i> | <i>indica</i>   | China |
| XuanEnChangTangQinZh     | <i>O. sativa</i> | <i>indica</i>   | China |
| MuGuaNuo                 | <i>O. sativa</i> | <i>japonica</i> | China |
| HanMaDao                 | <i>O. sativa</i> | <i>indica</i>   | China |
| MeiHuaNuo                | <i>O. sativa</i> | <i>indica</i>   | China |
| QiTouBaiGu               | <i>O. sativa</i> | <i>japonica</i> | China |
| ZuZhen B                 | <i>O. sativa</i> | <i>indica</i>   | China |
| ChaoYangYiHao B          | <i>O. sativa</i> | <i>indica</i>   | China |
| L 301B                   | <i>O. sativa</i> | <i>indica</i>   | China |
| AnNongWanJing B          | <i>O. sativa</i> | <i>japonica</i> | China |
| JinNanTe 43B             | <i>O. sativa</i> | <i>indica</i>   | China |
| ZhenXian 97B             | <i>O. sativa</i> | <i>indica</i>   | China |
| BaoXie 123B              | <i>O. sativa</i> | <i>indica</i>   | China |
| 80 B                     | <i>O. sativa</i> | <i>indica</i>   | China |
| BaoXie-7B                | <i>O. sativa</i> | <i>indica</i>   | China |
| 27760                    | <i>O. sativa</i> | <i>japonica</i> | China |
| GuangLuAi 4 Hao          | <i>O. sativa</i> | <i>indica</i>   | China |
| AiJiaoNanTe              | <i>O. sativa</i> | <i>indica</i>   | China |
| GuiHuaHuang              | <i>O. sativa</i> | <i>japonica</i> | China |
| ShuFeng101               | <i>O. sativa</i> | <i>indica</i>   | China |
| ZhongHua 8 Hao           | <i>O. sativa</i> | <i>japonica</i> | China |
| JinDao 1 Hao             | <i>O. sativa</i> | <i>japonica</i> | China |
| BaiGeDao                 | <i>O. sativa</i> | <i>japonica</i> | China |
| LeiHuoZang               | <i>O. sativa</i> | <i>indica</i>   | China |
| DongTingWanXian          | <i>O. sativa</i> | <i>indica</i>   | China |
| XuGuNuo                  | <i>O. sativa</i> | <i>japonica</i> | China |
| AiJiaoZao                | <i>O. sativa</i> | <i>indica</i>   | China |
| WangLiXian               | <i>O. sativa</i> | <i>indica</i>   | China |
| JiXueNuo                 | <i>O. sativa</i> | <i>japonica</i> | China |
| IR 661-1(Zao)            | <i>O. sativa</i> | <i>indica</i>   | China |
| Jing 7623                | <i>O. sativa</i> | <i>japonica</i> | China |
| LiuSha 1 Hao             | <i>O. sativa</i> | <i>indica</i>   | China |
| ErJiuNan 1 Hao           | <i>O. sativa</i> | <i>indica</i>   | China |
| NanJing 11 Hao           | <i>O. sativa</i> | <i>indica</i>   | China |
| ChengDuAi 3 Hao          | <i>O. sativa</i> | <i>indica</i>   | China |
| LiaoJing 287             | <i>O. sativa</i> | <i>japonica</i> | China |
| NanTianGangJiuGu         | <i>O. sativa</i> | <i>japonica</i> | China |
| GongJu 73                | <i>O. sativa</i> | <i>japonica</i> | China |
| SangBaiLi                | <i>O. sativa</i> | <i>indica</i>   | China |
| GaoYangDianDaoDaHONGMang | <i>O. sativa</i> | <i>japonica</i> | China |
| MuXiQiu                  | <i>O. sativa</i> | <i>japonica</i> | China |
| YouMangZaoGeng           | <i>O. sativa</i> | <i>japonica</i> | China |
| FeiDongTangDao           | <i>O. sativa</i> | <i>japonica</i> | China |
| E Si Niu                 | <i>O. sativa</i> | <i>indica</i>   | China |

|                      |                  |                 |       |
|----------------------|------------------|-----------------|-------|
| Hei Du 4             | <i>O. sativa</i> | <i>indica</i>   | China |
| ChiKeNuo             | <i>O. sativa</i> | <i>indica</i>   | China |
| DongTingWanXian      | <i>O. sativa</i> | <i>indica</i>   | China |
| BaWangBian 1         | <i>O. sativa</i> | <i>japonica</i> | China |
| HongQi 5 Hao         | <i>O. sativa</i> | <i>indica</i>   | China |
| XiangDao             | <i>O. sativa</i> | <i>indica</i>   | China |
| XiBaiZhan            | <i>O. sativa</i> | <i>indica</i>   | China |
| MaMaGu               | <i>O. sativa</i> | <i>indica</i>   | China |
| HongGu               | <i>O. sativa</i> | <i>indica</i>   | China |
| SanQiShiLuo          | <i>O. sativa</i> | <i>japonica</i> | China |
| MuBangGu             | <i>O. sativa</i> | <i>japonica</i> | China |
| XiangGu              | <i>O. sativa</i> | <i>japonica</i> | China |
| QingKe               | <i>O. sativa</i> | <i>indica</i>   | China |
| LengShuiGu 2         | <i>O. sativa</i> | <i>japonica</i> | China |
| FangHaoPi            | <i>O. sativa</i> | <i>indica</i>   | China |
| XianGai B            | <i>O. sativa</i> | <i>indica</i>   | China |
| JiangNongZao 1 Hao B | <i>O. sativa</i> | <i>indica</i>   | China |
| JingHu B             | <i>O. sativa</i> | <i>japonica</i> | China |
| LingMing B           | <i>O. sativa</i> | <i>japonica</i> | China |
| DianRui 409B         | <i>O. sativa</i> | <i>indica</i>   | China |
| G ZhenXian 97B       | <i>O. sativa</i> | <i>japonica</i> | China |
| 88B                  | <i>O. sativa</i> | <i>indica</i>   | China |
| Gu 154               | <i>O. sativa</i> | <i>indica</i>   | China |
| Gui 630              | <i>O. sativa</i> | <i>indica</i>   | China |
| TeQingXuanHui        | <i>O. sativa</i> | <i>indica</i>   | China |
| HuiXian 91269        | <i>O. sativa</i> | <i>indica</i>   | China |
| AiMaKang             | <i>O. sativa</i> | <i>indica</i>   | China |
| GuiChao 2 Hao        | <i>O. sativa</i> | <i>indica</i>   | China |
| BaoXuan 21 Hao       | <i>O. sativa</i> | <i>indica</i>   | China |
| XiangWanXian 1 Hao   | <i>O. sativa</i> | <i>indica</i>   | China |
| HuiXian 91269        | <i>O. sativa</i> | <i>indica</i>   | China |
| AiTuoGu 151          | <i>O. sativa</i> | <i>indica</i>   | China |
| HuangSiGuiZang       | <i>O. sativa</i> | <i>indica</i>   | China |
| XiangWanXian 3 Hao   | <i>O. sativa</i> | <i>indica</i>   | China |
| DangYu 5 Hao         | <i>O. sativa</i> | <i>japonica</i> | China |
| ChengNongShuiJing    | <i>O. sativa</i> | <i>indica</i>   | China |
| LaoHuZhong           | <i>O. sativa</i> | <i>japonica</i> | China |
| JinXiBai             | <i>O. sativa</i> | <i>indica</i>   | China |
| WuZiDui              | <i>O. sativa</i> | <i>japonica</i> | China |
| LaoZhaoGu            | <i>O. sativa</i> | <i>indica</i>   | China |
| JinZhiNuo            | <i>O. sativa</i> | <i>indica</i>   | China |
| BangJieMang          | <i>O. sativa</i> | <i>japonica</i> | China |
| BaBaiLi              | <i>O. sativa</i> | <i>japonica</i> | China |
| XiMaXian             | <i>O. sativa</i> | <i>indica</i>   | China |
| WuZhuiHongGu         | <i>O. sativa</i> | <i>indica</i>   | China |
| ZheGu                | <i>O. sativa</i> | <i>japonica</i> | China |
| MaGuNuo              | <i>O. sativa</i> | <i>japonica</i> | China |
| MaWeiZhan            | <i>O. sativa</i> | <i>indica</i>   | China |
| HongKeZheNuo         | <i>O. sativa</i> | <i>japonica</i> | China |
| YouZhan              | <i>O. sativa</i> | <i>japonica</i> | China |
| TaiZhongZaiLai 1     | <i>O. sativa</i> | <i>indica</i>   | China |

|                 |                  |                 |       |
|-----------------|------------------|-----------------|-------|
| MengJiaGao 1    | <i>O. sativa</i> | <i>japonica</i> | China |
| MengJiaDing 2   | <i>O. sativa</i> | <i>indica</i>   | China |
| JWR 221         | <i>O. sativa</i> | <i>japonica</i> | China |
| LiXinGeng       | <i>O. sativa</i> | <i>japonica</i> | China |
| YangDao 2 Hao   | <i>O. sativa</i> | <i>indica</i>   | China |
| MoMi            | <i>O. sativa</i> | <i>indica</i>   | China |
| ZhenXian 232    | <i>O. sativa</i> | <i>indica</i>   | China |
| Ai Mi           | <i>O. sativa</i> | <i>indica</i>   | China |
| BiWuSheng       | <i>O. sativa</i> | <i>indica</i>   | China |
| ChenWan 3       | <i>O. sativa</i> | <i>japonica</i> | China |
| JinYou 1        | <i>O. sativa</i> | <i>indica</i>   | China |
| SangJiuGu       | <i>O. sativa</i> | <i>japonica</i> | China |
| Hao Xian        | <i>O. sativa</i> | <i>indica</i>   | China |
| ZiMangFei E Nuo | <i>O. sativa</i> | <i>japonica</i> | China |
| TaiChung 65     | <i>O. sativa</i> | <i>japonica</i> | China |

**Supplemental Data set 3a.** Wild rice accessions used in the selective sweep analysis.

| Accession number<br>(IRGC ACC NO.) | Species             | Original area |
|------------------------------------|---------------------|---------------|
| IRGC8788                           | <i>O. rufipogon</i> | Bangladesh    |
| IRGC105881                         | <i>O. rufipogon</i> | Bangladesh    |
| IRGC106160                         | <i>O. rufipogon</i> | Lao Pdr       |
| IRGC104996                         | <i>O. rufipogon</i> | India         |
| IRGC106078                         | <i>O. rufipogon</i> | India         |
| IRGC106115                         | <i>O. rufipogon</i> | India         |
| IRGC104999                         | <i>O. rufipogon</i> | Indonesia     |
| IRGC105956                         | <i>O. rufipogon</i> | Indonesia     |
| IRGC86542                          | <i>O. rufipogon</i> | Australia     |
| IRGC93285                          | <i>O. rufipogon</i> | Nepal         |
| IRGC101075                         | <i>O. rufipogon</i> | Philippines   |
| IRGC93131                          | <i>O. rufipogon</i> | Cambodia      |
| IRGC100639                         | <i>O. rufipogon</i> | Taiwan        |
| IRGC101075                         | <i>O. rufipogon</i> | Philippines   |
| IRGC104792                         | <i>O. rufipogon</i> | Thailand      |
| IRGC105424                         | <i>O. rufipogon</i> | Sri Lanka     |
| IRGC105948                         | <i>O. rufipogon</i> | Thailand      |
| IRGC106152                         | <i>O. rufipogon</i> | Lao Pdr       |
| IRGC104107                         | <i>O. rufipogon</i> | Chad          |
| Ruf32105505                        | <i>O. rufipogon</i> | Mali          |
| IRGC88906                          | <i>O. nivara</i>    | Cambodia      |
| IRGC110415                         | <i>O. nivara</i>    | Cambodia      |
| IRGC93195                          | <i>O. nivara</i>    | Nepal         |
| IRGC93196                          | <i>O. nivara</i>    | Nepal         |
| IRGC104687                         | <i>O. nivara</i>    | India         |
| IRGC105631                         | <i>O. nivara</i>    | India         |
| IRGC105458                         | <i>O. nivara</i>    | Sri Lanka     |
| IRGC105959                         | <i>O. nivara</i>    | Bangladesh    |
| IRGC88906                          | <i>O. nivara</i>    | Lao Pdr       |
| IRGC110415                         | <i>O. nivara</i>    | Lao Pdr       |

|            |                  |          |
|------------|------------------|----------|
| IRGC92890  | <i>O. nivara</i> | Cambodia |
| IRGC104687 | <i>O. nivara</i> | India    |
| IRGC104697 | <i>O. nivara</i> | India    |
| IRGC104852 | <i>O. nivara</i> | Thailand |
| IRGC104969 | <i>O. nivara</i> | China    |

**Supplemental Data set 3b. Rice cultivars used in the selective sweep analysis.**

| Name                | Species          | Subspecies      | Original area |
|---------------------|------------------|-----------------|---------------|
| Libu                | <i>O. sativa</i> | <i>japonica</i> | Philippines   |
| Kutube              | <i>O. sativa</i> | <i>japonica</i> | Philippines   |
| Bunian              | <i>O. sativa</i> | <i>japonica</i> | Philippines   |
| Lepqu               | <i>O. sativa</i> | <i>japonica</i> | Philippines   |
| Methi Noi           | <i>O. sativa</i> | <i>japonica</i> | Laos          |
| Rasi Pagalou        | <i>O. sativa</i> | <i>japonica</i> | Malaysia      |
| Chabli Chabol Glang | <i>O. sativa</i> | <i>japonica</i> | Thailand      |
| Do Khao             | <i>O. sativa</i> | <i>japonica</i> | Laos          |
| Bhat Mukhu          | <i>O. sativa</i> | <i>indica</i>   | Bengal        |
| Jabonl              | <i>O. sativa</i> | <i>japonica</i> | Bengal        |
| Kasinkan            | <i>O. sativa</i> | <i>japonica</i> | Philippines   |
| DoDo                | <i>O. sativa</i> | <i>indica</i>   | Philippines   |
| Fukuyama            | <i>O. sativa</i> | <i>japonica</i> | Japan         |
| System 400          | <i>O. sativa</i> | <i>japonica</i> | Korea         |
| DM36                | <i>O. sativa</i> | <i>indica</i>   | Vietnam       |
| KK15-37-C           | <i>O. sativa</i> | <i>indica</i>   | Nepal         |
| Qing Feng           | <i>O. sativa</i> | <i>japonica</i> | Japan         |
| GeLuo 4             | <i>O. sativa</i> | <i>indica</i>   | Thailand      |
| Liri Palmen         | <i>O. sativa</i> | <i>indica</i>   | Pakistan      |
| Barkat              | <i>O. sativa</i> | <i>indica</i>   | India         |
| Kashmin Basmali     | <i>O. sativa</i> | <i>indica</i>   | Pakistan      |
| Sein Ta lay         | <i>O. sativa</i> | <i>indica</i>   | Myanmar       |
| Polayal upland      | <i>O. sativa</i> | <i>indica</i>   | Sri Lanka     |
| Naw Sadui           | <i>O. sativa</i> | <i>indica</i>   | Thailand      |
| Kalu Murunga        | <i>O. sativa</i> | <i>indica</i>   | Pakistan      |
| XX-4                | <i>O. sativa</i> | <i>indica</i>   | Thailand      |
| Chiem Bua           | <i>O. sativa</i> | <i>indica</i>   | Vietnam       |
| Re Them Ha Dong     | <i>O. sativa</i> | <i>indica</i>   | Vietnam       |
| Sai Duong Thamhheai | <i>O. sativa</i> | <i>indica</i>   | Vietnam       |
| Chakula             | <i>O. sativa</i> | <i>indica</i>   | Bengal        |
| GH 319              | <i>O. sativa</i> | <i>indica</i>   | Indonesia     |
| Muda                | <i>O. sativa</i> | <i>indica</i>   | Malaysia      |
| Beok Montor         | <i>O. sativa</i> | <i>indica</i>   | Indonesia     |
| Ase Bolon Kamandi   | <i>O. sativa</i> | <i>indica</i>   | Indonesia     |
| Kathemax            | <i>O. sativa</i> | <i>indica</i>   | Indonesia     |
| YouFeng             | <i>O. sativa</i> | <i>japonica</i> | Japan         |
| GaoLiQiu            | <i>O. sativa</i> | <i>japonica</i> | Korea         |
| MiLiZhu             | <i>O. sativa</i> | <i>japonica</i> | Korea         |
| ChangZhong          | <i>O. sativa</i> | <i>japonica</i> | China         |
| SanChaoQI           | <i>O. sativa</i> | <i>japonica</i> | China         |
| PuTaoLvZhong        | <i>O. sativa</i> | <i>japonica</i> | China         |

|               |                  |                 |       |
|---------------|------------------|-----------------|-------|
| SanYiQian     | <i>O. sativa</i> | <i>japonica</i> | China |
| TianJiQing    | <i>O. sativa</i> | <i>japonica</i> | China |
| ChiHeiTouHong | <i>O. sativa</i> | <i>japonica</i> | China |
| CunSangLi     | <i>O. sativa</i> | <i>japonica</i> | China |

**Supplemental Data set 4.** Rice cultivars used to analyze the distribution of GAD1/gad1 and two other awn-related genes.

| Name                | Species          | Subspecies      | Original area |
|---------------------|------------------|-----------------|---------------|
| Libu                | <i>O. sativa</i> | <i>japonica</i> | Philippines   |
| Kutube              | <i>O. sativa</i> | <i>japonica</i> | Philippines   |
| Methi Noi           | <i>O. sativa</i> | <i>japonica</i> | Laos          |
| Rasi Pagalou        | <i>O. sativa</i> | <i>japonica</i> | Malaysia      |
| Chabli Chabol Glang | <i>O. sativa</i> | <i>japonica</i> | Thailand      |
| Achar Bhog          | <i>O. sativa</i> | <i>indica</i>   | Bengal        |
| Do Khao             | <i>O. sativa</i> | <i>japonica</i> | China         |
| Kenteng             | <i>O. sativa</i> | <i>japonica</i> | Laos          |
| Lepsang             | <i>O. sativa</i> | <i>japonica</i> | Laos          |
| Bhat Mukhu          | <i>O. sativa</i> | <i>indica</i>   | Bengal        |
| Jabonl              | <i>O. sativa</i> | <i>japonica</i> | Bengal        |
| DoDo                | <i>O. sativa</i> | <i>indica</i>   | Philippines   |
| Hr33                | <i>O. sativa</i> | <i>indica</i>   | Philippines   |
| R2389               | <i>O. sativa</i> | <i>indica</i>   | Philippines   |
| Act                 | <i>O. sativa</i> | <i>indica</i>   | Philippines   |
| Lukip               | <i>O. sativa</i> | <i>japonica</i> | Philippines   |
| System 400          | <i>O. sativa</i> | <i>japonica</i> | Korea         |
| Mollika(sel)        | <i>O. sativa</i> | <i>indica</i>   | Nepal         |
| KK15-37-C           | <i>O. sativa</i> | <i>indica</i>   | Nepal         |
| Qing Feng           | <i>O. sativa</i> | <i>japonica</i> | Japan         |
| GeLuo 4             | <i>O. sativa</i> | <i>indica</i>   | Thailand      |
| Liri Palmen         | <i>O. sativa</i> | <i>indica</i>   | Pakistan      |
| Barkat              | <i>O. sativa</i> | <i>indica</i>   | India         |
| Kashmin Basmali     | <i>O. sativa</i> | <i>indica</i>   | Pakistan      |
| Sein Ta lay         | <i>O. sativa</i> | <i>indica</i>   | Myanmar       |
| Horomamawee         | <i>O. sativa</i> | <i>indica</i>   | Sri Lanka     |
| Naw Sadui           | <i>O. sativa</i> | <i>indica</i>   | Thailand      |
| Basmati Dhan        | <i>O. sativa</i> | <i>indica</i>   | Pakistan      |
| Kalu Murunga        | <i>O. sativa</i> | <i>indica</i>   | Pakistan      |
| XX-4                | <i>O. sativa</i> | <i>indica</i>   | Thailand      |
| Basmati Kamon       | <i>O. sativa</i> | <i>indica</i>   | Pakistan      |
| Basmati Hunar       | <i>O. sativa</i> | <i>indica</i>   | Pakistan      |
| PyongYang 11        | <i>O. sativa</i> | <i>japonica</i> | Korea         |
| Lateefy             | <i>O. sativa</i> | <i>indica</i>   | Pakistan      |
| Chiem Bua           | <i>O. sativa</i> | <i>indica</i>   | Vietnam       |
| Re Them Ha Dong     | <i>O. sativa</i> | <i>indica</i>   | Vietnam       |
| Tep1                | <i>O. sativa</i> | <i>indica</i>   | Vietnam       |
| DR32                | <i>O. sativa</i> | <i>indica</i>   | Vietnam       |
| Chakula             | <i>O. sativa</i> | <i>indica</i>   | Bengal        |
| Kangpur             | <i>O. sativa</i> | <i>indica</i>   | Bengal        |
| GH 319              | <i>O. sativa</i> | <i>indica</i>   | Indonesia     |
| Muda                | <i>O. sativa</i> | <i>indica</i>   | Malaysia      |



|                      |                  |                 |           |
|----------------------|------------------|-----------------|-----------|
| Beok Montor          | <i>O. sativa</i> | <i>indica</i>   | Indonesia |
| Sipapak              | <i>O. sativa</i> | <i>japonica</i> | Indonesia |
| Ase Bolon Kamandi    | <i>O. sativa</i> | <i>indica</i>   | Indonesia |
| Bali Ketumbaran      | <i>O. sativa</i> | <i>indica</i>   | Indonesia |
| Beri                 | <i>O. sativa</i> | <i>indica</i>   | Bengal    |
| Kathemax             | <i>O. sativa</i> | <i>indica</i>   | Indonesia |
| HuangHai 33          | <i>O. sativa</i> | <i>japonica</i> | Korea     |
| GongJinNuo           | <i>O. sativa</i> | <i>japonica</i> | Japan     |
| PingBei 9            | <i>O. sativa</i> | <i>japonica</i> | Korea     |
| PingBei 9            | <i>O. sativa</i> | <i>japonica</i> | Korea     |
| GaoLiQiu             | <i>O. sativa</i> | <i>japonica</i> | Korea     |
| CN36715              | <i>O. sativa</i> | <i>japonica</i> | Japan     |
| Jabahulo             | <i>O. sativa</i> | <i>indica</i>   | Bengal    |
| XiaoLuoHan           | <i>O. sativa</i> | <i>japonica</i> | China     |
| ChangZhong           | <i>O. sativa</i> | <i>japonica</i> | China     |
| HuangDaoQi           | <i>O. sativa</i> | <i>japonica</i> | China     |
| MuXiuQiu             | <i>O. sativa</i> | <i>japonica</i> | China     |
| SanYiQian            | <i>O. sativa</i> | <i>japonica</i> | China     |
| TianJiQing           | <i>O. sativa</i> | <i>japonica</i> | China     |
| CunSangLi            | <i>O. sativa</i> | <i>japonica</i> | China     |
| PADI LUMOU           | <i>O. sativa</i> | <i>japonica</i> | China     |
| PADI KARTAK          | <i>O. sativa</i> | <i>japonica</i> | China     |
| PADI MANIS           | <i>O. sativa</i> | <i>japonica</i> | China     |
| PADI WARIK           | <i>O. sativa</i> | <i>japonica</i> | China     |
| PADI WARIK           | <i>O. sativa</i> | <i>japonica</i> | China     |
| TAIBEI309            | <i>O. sativa</i> | <i>japonica</i> | China     |
| MEHR                 | <i>O. sativa</i> | <i>japonica</i> | China     |
| TREM BESE            | <i>O. sativa</i> | <i>japonica</i> | China     |
| LUK TAKHAA           | <i>O. sativa</i> | <i>japonica</i> | China     |
| BHOLI BORO           | <i>O. sativa</i> | <i>japonica</i> | China     |
| NanXiongZaoYouZang   | <i>O. sativa</i> | <i>indica</i>   | China     |
| XingGuo              | <i>O. sativa</i> | <i>japonica</i> | China     |
| BaiBaoDao            | <i>O. sativa</i> | <i>japonica</i> | China     |
| XiangAiZao10Hao      | <i>O. sativa</i> | <i>indica</i>   | China     |
| NanTeHao             | <i>O. sativa</i> | <i>indica</i>   | China     |
| ZaoXian140           | <i>O. sativa</i> | <i>indica</i>   | China     |
| RongHuaMaoHuLu       | <i>O. sativa</i> | <i>japonica</i> | China     |
| ShuiYuan300Li        | <i>O. sativa</i> | <i>japonica</i> | China     |
| YeLiCangHua          | <i>O. sativa</i> | <i>japonica</i> | China     |
| ZhongLouYiHao 1      | <i>O. sativa</i> | <i>japonica</i> | China     |
| WeiGuo               | <i>O. sativa</i> | <i>japonica</i> | China     |
| TieGanWu             | <i>O. sativa</i> | <i>japonica</i> | China     |
| TaiShanNuo           | <i>O. sativa</i> | <i>indica</i>   | China     |
| HengXianLiangChunBen | <i>O. sativa</i> | <i>indica</i>   | China     |
| LiuYeZhan            | <i>O. sativa</i> | <i>indica</i>   | China     |
| XuanEnChangTangQinZh | <i>O. sativa</i> | <i>indica</i>   | China     |
| MuGuaNuo             | <i>O. sativa</i> | <i>japonica</i> | China     |
| HanMaDao             | <i>O. sativa</i> | <i>indica</i>   | China     |
| MeiHuaNuo            | <i>O. sativa</i> | <i>indica</i>   | China     |
| QiTouBaiGu           | <i>O. sativa</i> | <i>japonica</i> | China     |
| ZuZhen B             | <i>O. sativa</i> | <i>indica</i>   | China     |

|                          |                  |                 |       |
|--------------------------|------------------|-----------------|-------|
| ChaoYangYiHao B          | <i>O. sativa</i> | <i>indica</i>   | China |
| AnNongWanJing B          | <i>O. sativa</i> | <i>japonica</i> | China |
| ZhenXian 97B             | <i>O. sativa</i> | <i>indica</i>   | China |
| 80 B                     | <i>O. sativa</i> | <i>indica</i>   | China |
| NingHui 21               | <i>O. sativa</i> | <i>japonica</i> | China |
| Jan-76                   | <i>O. sativa</i> | <i>japonica</i> | China |
| GuangLuAi 4 Hao          | <i>O. sativa</i> | <i>indica</i>   | China |
| AiJiaoNanTe              | <i>O. sativa</i> | <i>indica</i>   | China |
| GuiHuaHuang              | <i>O. sativa</i> | <i>japonica</i> | China |
| ShuFeng101               | <i>O. sativa</i> | <i>indica</i>   | China |
| BaiGeDao                 | <i>O. sativa</i> | <i>japonica</i> | China |
| LeiHuoZang               | <i>O. sativa</i> | <i>indica</i>   | China |
| DongTingWanXian          | <i>O. sativa</i> | <i>indica</i>   | China |
| XuGuNuo                  | <i>O. sativa</i> | <i>japonica</i> | China |
| AiJiaoZao                | <i>O. sativa</i> | <i>indica</i>   | China |
| WangLiXian               | <i>O. sativa</i> | <i>indica</i>   | China |
| JiXueNuo                 | <i>O. sativa</i> | <i>japonica</i> | China |
| IR 661-1(Zao)            | <i>O. sativa</i> | <i>indica</i>   | China |
| Jing 7623                | <i>O. sativa</i> | <i>japonica</i> | China |
| LiuSha 1 Hao             | <i>O. sativa</i> | <i>indica</i>   | China |
| ErJiuNan 1 Hao           | <i>O. sativa</i> | <i>indica</i>   | China |
| NanJing 11 Hao           | <i>O. sativa</i> | <i>indica</i>   | China |
| ChengDuAi 3 Hao          | <i>O. sativa</i> | <i>indica</i>   | China |
| LiaoJing 287             | <i>O. sativa</i> | <i>japonica</i> | China |
| GongJu 73                | <i>O. sativa</i> | <i>japonica</i> | China |
| SangBaiLi                | <i>O. sativa</i> | <i>indica</i>   | China |
| GaoYangDianDaoDaHONGMang | <i>O. sativa</i> | <i>japonica</i> | China |
| MuXiQiu                  | <i>O. sativa</i> | <i>japonica</i> | China |
| YouMangZaoGeng           | <i>O. sativa</i> | <i>japonica</i> | China |
| FeiDongTangDao           | <i>O. sativa</i> | <i>japonica</i> | China |
| Hei Du 4                 | <i>O. sativa</i> | <i>indica</i>   | China |
| ChiKeNuo                 | <i>O. sativa</i> | <i>indica</i>   | China |
| DongTingWanXian          | <i>O. sativa</i> | <i>indica</i>   | China |
| BaWangBian 1             | <i>O. sativa</i> | <i>japonica</i> | China |
| HongQi 5 Hao             | <i>O. sativa</i> | <i>indica</i>   | China |
| XiangDao                 | <i>O. sativa</i> | <i>indica</i>   | China |
| XiBaiZhan                | <i>O. sativa</i> | <i>indica</i>   | China |
| MuBangGu                 | <i>O. sativa</i> | <i>japonica</i> | China |
| XiangGu                  | <i>O. sativa</i> | <i>japonica</i> | China |
| LengShuiGu 2             | <i>O. sativa</i> | <i>japonica</i> | China |
| JiangNongZao 1 Hao B     | <i>O. sativa</i> | <i>indica</i>   | China |
| JingHu B                 | <i>O. sativa</i> | <i>japonica</i> | China |
| LingMing B               | <i>O. sativa</i> | <i>japonica</i> | China |
| DianRui 409B             | <i>O. sativa</i> | <i>indica</i>   | China |
| G ZhenXian 97B           | <i>O. sativa</i> | <i>japonica</i> | China |
| 88B                      | <i>O. sativa</i> | <i>indica</i>   | China |
| Gui 630                  | <i>O. sativa</i> | <i>indica</i>   | China |
| HuiXian 91269            | <i>O. sativa</i> | <i>indica</i>   | China |
| AiMaKang                 | <i>O. sativa</i> | <i>indica</i>   | China |
| GuiChao 2 Hao            | <i>O. sativa</i> | <i>indica</i>   | China |

|                    |                  |                 |       |
|--------------------|------------------|-----------------|-------|
| XiangWanXian 1 Hao | <i>O. sativa</i> | <i>indica</i>   | China |
| HuiXian 91269      | <i>O. sativa</i> | <i>indica</i>   | China |
| AiTuoGu 151        | <i>O. sativa</i> | <i>indica</i>   | China |
| HuangSiGuiZang     | <i>O. sativa</i> | <i>indica</i>   | China |
| DangYu 5 Hao       | <i>O. sativa</i> | <i>japonica</i> | China |
| ChengNongShuiJing  | <i>O. sativa</i> | <i>indica</i>   | China |
| BangJieMang        | <i>O. sativa</i> | <i>japonica</i> | China |
| MaGuNuo            | <i>O. sativa</i> | <i>japonica</i> | China |
| MaWeiZhan          | <i>O. sativa</i> | <i>indica</i>   | China |
| YouZhan            | <i>O. sativa</i> | <i>japonica</i> | China |
| MengJiaGao 1       | <i>O. sativa</i> | <i>japonica</i> | China |
| MengJiaDing 2      | <i>O. sativa</i> | <i>indica</i>   | China |
| LiXinGeng          | <i>O. sativa</i> | <i>japonica</i> | China |
| BiWuSheng          | <i>O. sativa</i> | <i>indica</i>   | China |
| ZiMangFei E Nuo    | <i>O. sativa</i> | <i>japonica</i> | China |
| TaiChung 65        | <i>O. sativa</i> | <i>japonica</i> | China |

---
